# Supplementary material
Source: PubMed Central journal article supplement (PMC3174631)
Supplement: 1106862108_pnas.201106862SI.pdf [file 1106862108_pnas.201106862SI.pdf]

# Supporting Information

Chang et al. 10.1073/pnas.1106862108

## SI Materials and Methods

**Imaging Analyses.** To calculate mito-Case12:mito-RFP ratio in moving and stationary mitochondria, individual mitochondria were outlined and the average fluorescence intensity (normalized to the area of the mitochondria) was determined per time point. Area of each mitochondrion was determined by outlining the mito-RFP signal, and intensity values for mito-RFP and mito-Case12 in the same outlined area were measured in the red and green channel, respectively. Measurements were excluded when mitochondria overlapped each other because accurate determination of intensity was impossible. At least 20 frames (> 100 s) were used to calculate average mito-Case12:mito-RFP ratio. To account for difference in fluorescence intensities between different transfections, the ratio of stationary mitochondria was normalized to the ratio of stationary mitochondria obtained from the first batch of neurons and all ratios were scaled proportionally. The average speed of moving mitochondria was tracked

using the Manual Tracking Plugin in ImageJ. At least 20 frames (> 100 s) were used to calculate the average speed of mitochondrial movement. Mitochondrial mobility was determined by counting the percentage of moving mitochondria over the 5-min imaging period. Mitochondrion is labeled as moving if it moved in three consecutive frames (over a 15-s period) over a distance of at least 0.1  $\mu\text{m}$ . To generate kymographs, axons were straightened using the Straighten plugin in ImageJ, resliced, and then z-projected (sum intensities). When measuring fold-change in fluorescence intensities before and after drug treatment, fluorescence intensities of all mitochondria in axons or cell bodies were measured (as indicated), and compared with the time point right before drug application. To determine mitochondrial length, the Shape Descriptors plugin in ImageJ was used, and mitochondrial length is defined by the length of the major axis.

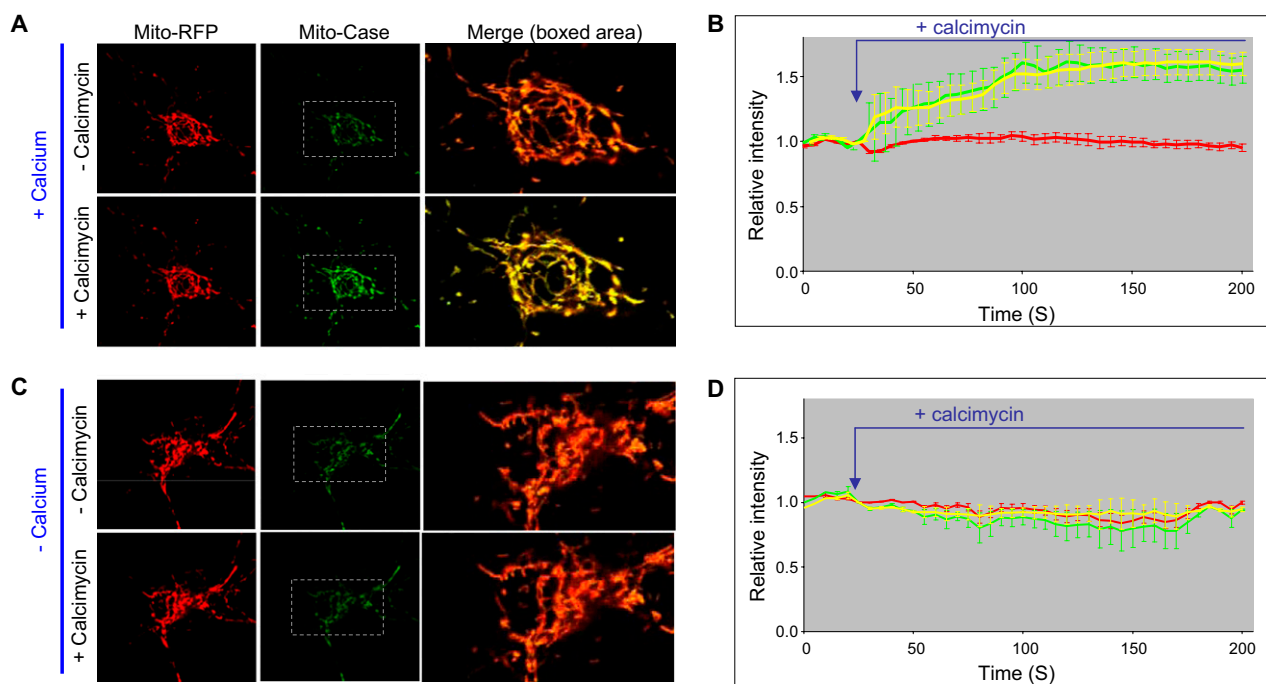

**Fig. S1.** Mito-Case12 can detect increase in  $\text{Ca}^{2+}$  following calcimycin treatment. (A and C) Images of neurons transfected with mito-Case12 (green) and mito-RFP (red) before and after the addition of 2  $\mu\text{g}/\text{mL}$  calcimycin, a  $\text{Ca}^{2+}$  ionophore, in the presence and absence of extracellular  $\text{Ca}^{2+}$ , respectively. (Scale bars, 10  $\mu\text{m}$ .) Boxed area is magnified in the merged image. (B) Fold-change in fluorescence intensities of mito-case12 (green line), mito-RFP (red line), and mito-Case12:mito-RFP ratio (yellow line) before and after addition of calcimycin in normal  $\text{Ca}^{2+}$  extracellular solution. (D) Same as B, except done in  $\text{Ca}^{2+}$ -free extracellular solution. Values represent mean  $\pm$  SEM,  $n = 6$  neurons (B) and 3 neurons (D).

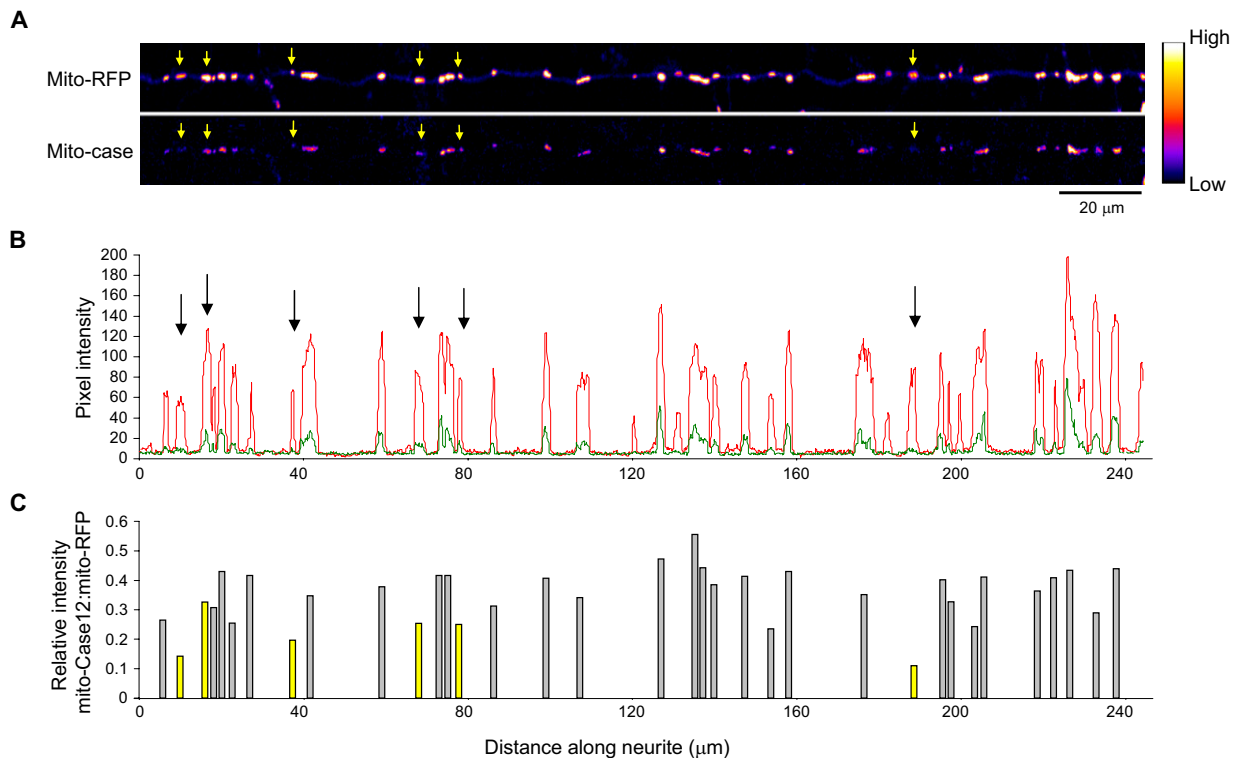

**Fig. S2.** Moving mitochondria tend to have lower calcium content. (A) Pseudocolored images of an axonal segment of a neuron cotransfected with mito-RFP and mito-Case12 as shown in Fig. 1A. Arrows point to moving mitochondria. (B) Raw intensity profiles of mito-RFP (red) and mito-Case12 (green) as determined using ImageJ. Arrows point to moving mitochondria. (C) Ratio of mito-case12 to mito-RFP shown for the axonal segment. Gray bars indicate ratio for stationary mitochondria, whereas yellow bars represent ratio for moving mitochondria.

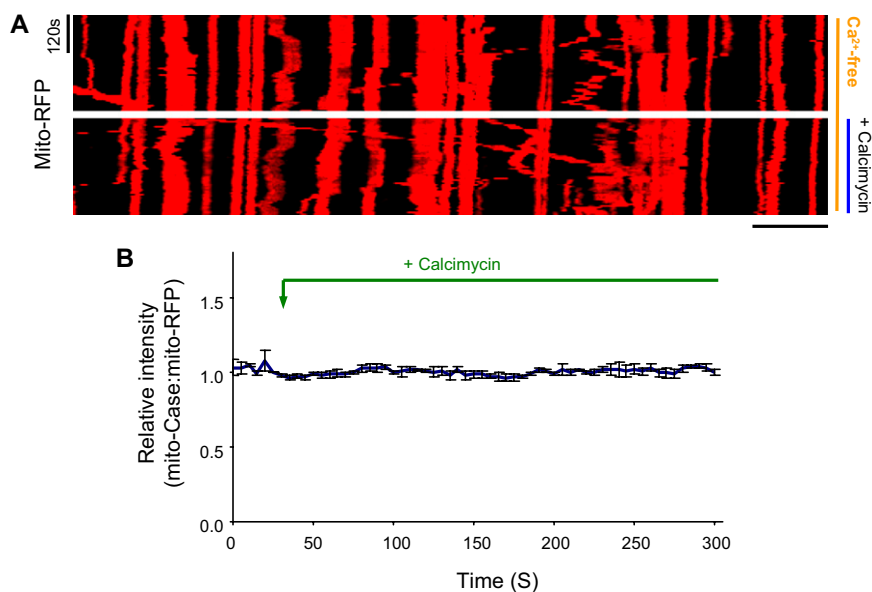

**Fig. S3.** Calcimycin-induced mitochondrial movement arrest requires  $\text{Ca}^{2+}$ . (A) Kymograph showing mitochondria retain movement upon addition of calcimycin in  $\text{Ca}^{2+}$ -free extracellular solution. (Scale bar, 10  $\mu\text{m}$ .) (B) Calcimycin does not induce changes in mito-Case:mito-RFP ratio in the absence of  $\text{Ca}^{2+}$ . Values represent mean  $\pm$  SEM,  $n = 4$  axons.



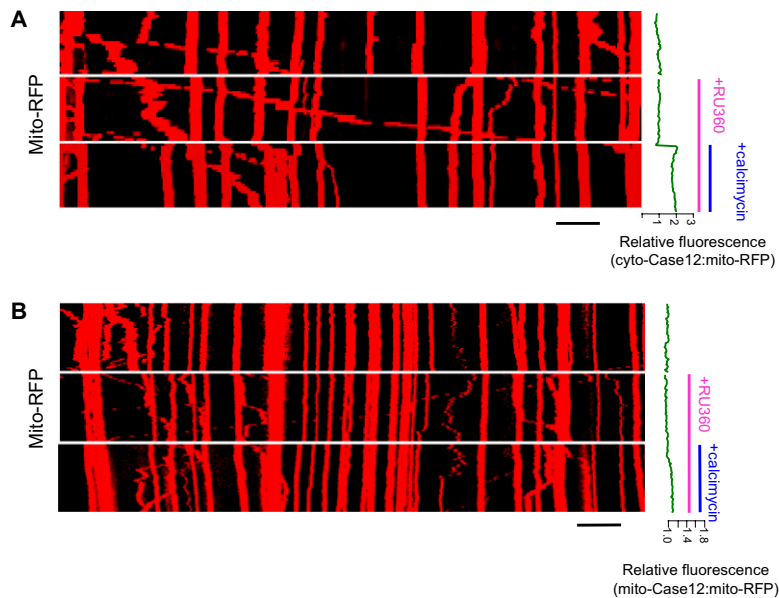

**Fig. S6.** RU360 treatment prevented calcimycin-induced stop in mitochondrial movement in extracellular solution containing low  $\text{Ca}^{2+}$  (0.18 mM  $\text{Ca}^{2+}$ ). (A) Kymograph of a neuron transfected with mito-RFP and cyto-Case12. Cyto-Case12:mitoRFP profile in the absence and presence of RU360 and calcimycin is shown on the right. RU360 treatment maintained mitochondrial mobility despite high cytoplasmic  $\text{Ca}^{2+}$  elevation. (B) Kymograph of a neuron transfected with mito-RFP and mito-Case12 before and after RU360 and calcimycin treatment. Mito-Case12:mito-RFP profile is shown on the right. (Scale bars, 10  $\mu\text{m}$ .)

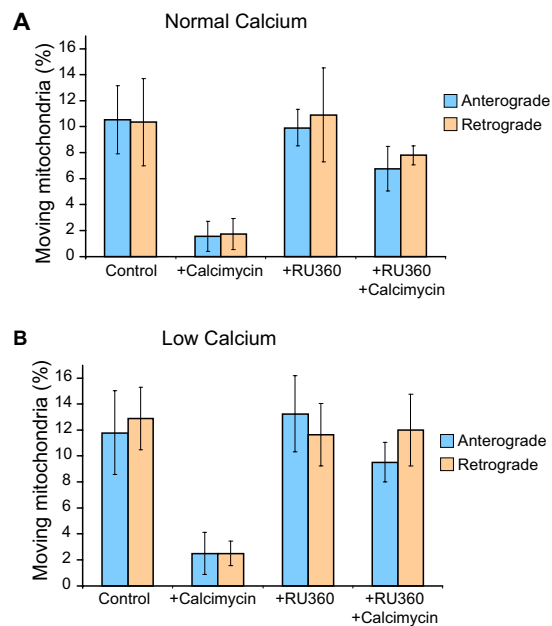

**Fig. S7.** Calcimycin and RU360 treatment did not change directionality of mitochondrial transport. Percentage of mitochondria moving in anterograde or retrograde direction as indicated for each treatment. (A) Summary of results in normal extracellular solution (1.8 mM  $\text{Ca}^{2+}$ ) and (B) in extracellular solution containing low  $\text{Ca}^{2+}$  (0.18 mM  $\text{Ca}^{2+}$ ). Note that the proportion of mitochondria moving in anterograde and retrograde direction remained the same.  $n > 100$  mitochondria from at least five axons in the different conditions. Values represent mean  $\pm$  SEM.

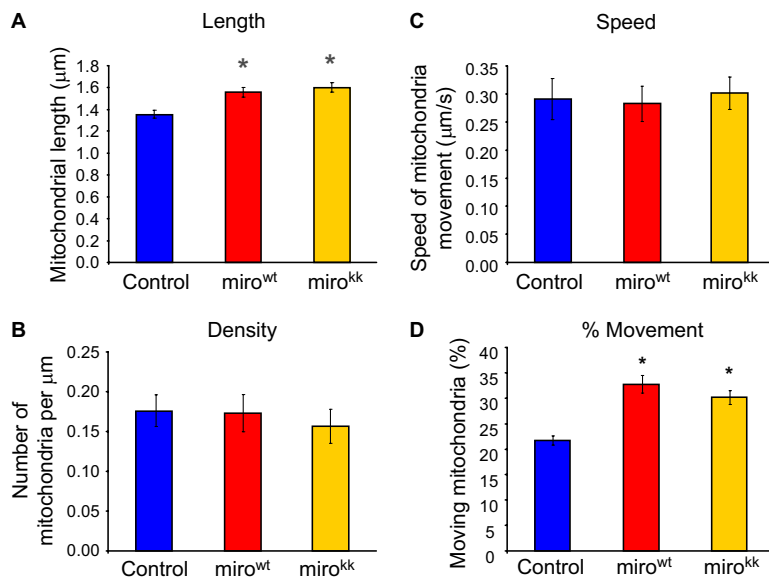

**Fig. 58.** Neurons expressing *miro*<sup>wt</sup> and *miro*<sup>kk</sup> altered mitochondrial length and percentage of moving mitochondria, but not mitochondrial density nor the average speed of mitochondrial movement in axons. (A) Average length of mitochondria. (B) Density, or the number of mitochondria per micrometer, in axons. (C) Average speed of movement determined from mobile mitochondria. (D) Percentage of moving mitochondria. Values represent mean  $\pm$  SEM and  $n > 180$  mitochondria examined per condition from at least four axons in A, B, and D. In C,  $n = 40$ –50 mitochondria per condition. \* $P < 0.05$ .

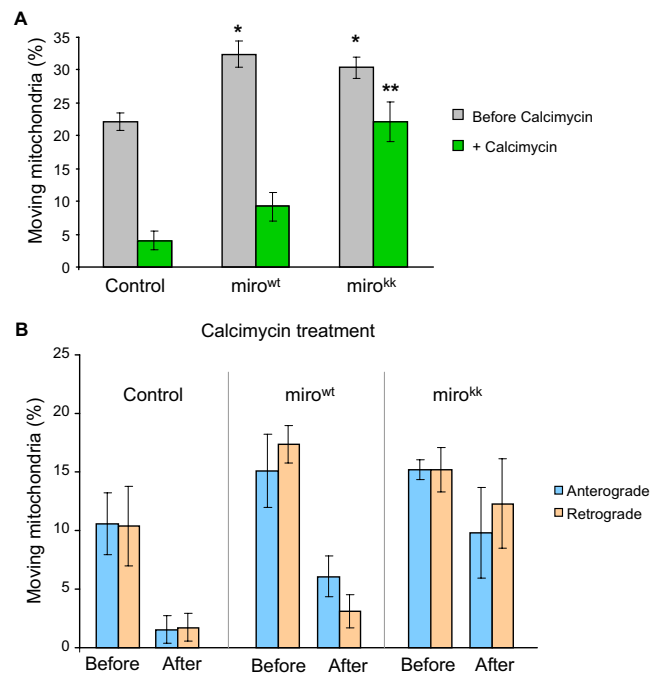

**Fig. 59.** Calcimycin treatment did not arrest mitochondrial movement in *miro*<sup>kk</sup>-transfected neurons. (A) Percentage of moving mitochondria before and after calcimycin treatment as indicated. \* $P < 0.05$  compared with control before the addition of calcimycin. \*\* $P < 0.05$  compared with control after calcimycin treatment. (B) Percentage of mitochondria moving in anterograde or retrograde direction before and after calcimycin treatment. All values represent mean  $\pm$  SEM,  $n > 110$  mitochondria from at least four axons per condition.

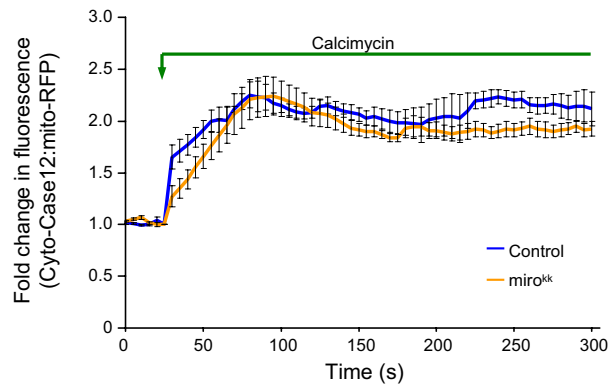

**Fig. S10.** *Miro<sup>kk</sup>* does not alter  $\text{Ca}^{2+}$  influx into the cytoplasm. Fold-change in cytoplasmic Case 12 signal is normalized to that of mito-RFP to reduce variation due to drifts in z axis during imaging. Values represent mean  $\pm$  SEM,  $n = 4$  axons for each.

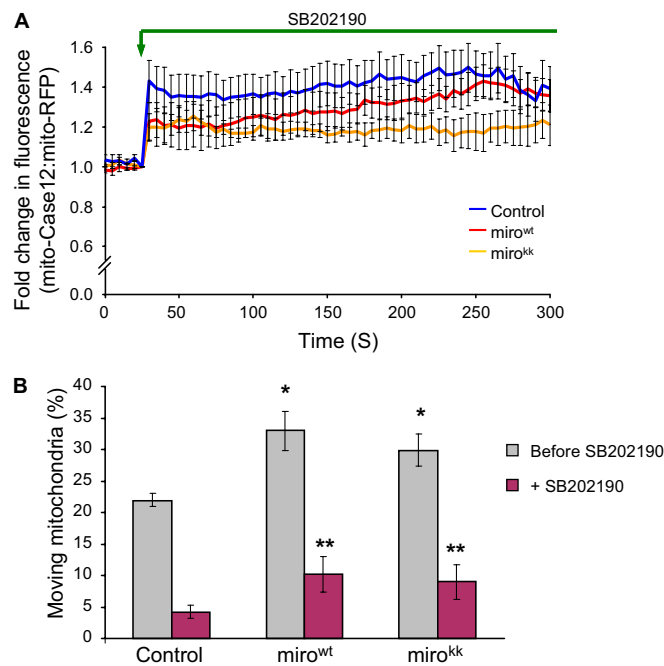

**Fig. S11.** SB202190 treatment paused mitochondrial transport in both *miro<sup>wt</sup>*- and *miro<sup>kk</sup>*-transfected neurons. (A) Mito-Case12 to mito-RFP ratio before and after SB202190 treatment in axons. (B) Percentage of moving mitochondria before and after SB202190 treatment as indicated. \* $P < 0.05$  compared with control before the addition of SB202190. \*\* $P < 0.05$  compared with control after SB202190 treatment. Values represent mean  $\pm$  SEM,  $n > 160$  mitochondria from four to eight axons analyzed per condition.

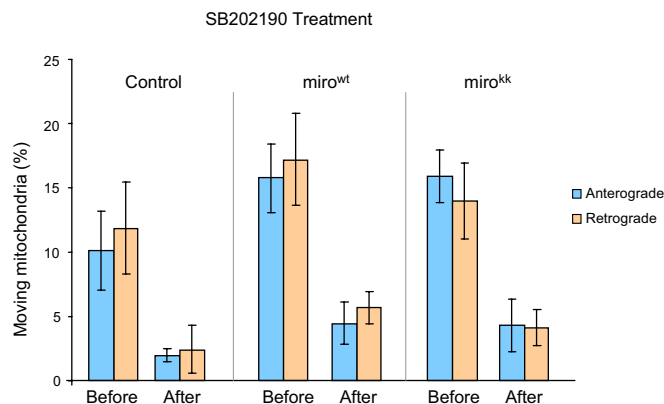

**Fig. S12.** SB202190 treatment did not change the directionality of mitochondrial transport. Percentage of anterogradely and retrogradely moving mitochondria as indicated for each condition. Values represent mean  $\pm$  SEM,  $n > 160$  mitochondria from four axons per condition.

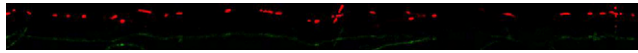

**Movie S1.** Calcimycin treatment increases mitochondrial calcium and stops mitochondrial movement. Axonal segment of neuron cotransfected with mito-RFP (*Upper*) and cyto-Case12 (*Lower*) imaged for 5 min before and after calcimycin treatment. Images were acquired at 5-s intervals, compressed to 15 frames per second in the movie.

[Movie S1](#)

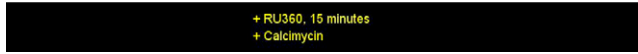

**Movie S2.** Inhibition of mitochondrial calcium uniporter allows continued mitochondrial movement in the presence of high intracellular calcium. Neuron cotransfected with mito-RFP (*Upper*) and cyto-Case12 (*Lower*) was incubated with RU360 for 15 min, and calcimycin was added at the beginning of this movie. Images were acquired at 5-s intervals, compressed 15 frames per second in the movie.

[Movie S2](#)
